# Supplementary material for: Improving Newborn Resuscitation by Making Every Birth a Learning Event
Source: MDPI journal article supplement (doi:10.3390/children8121194), 2021-12-16
Supplement: s1 [file s1]

**Supplemental Table S1. Keywords used in searches for bedside learning strategies**

| Bedside Learning Strategy                 | Keywords                                                                                                                                                                                                                                                                                                                                                                                                                                                                                       |
|-------------------------------------------|------------------------------------------------------------------------------------------------------------------------------------------------------------------------------------------------------------------------------------------------------------------------------------------------------------------------------------------------------------------------------------------------------------------------------------------------------------------------------------------------|
| Visual display of resuscitation algorithm | Neonatal Resuscitation Program algorithm<br>Helping Babies Breathe algorithm<br>Helping Babies Breathe action plan<br>Newborn resuscitation cognitive aid                                                                                                                                                                                                                                                                                                                                      |
| Peer-to-peer support                      | Peer support newborn resuscitation<br>Team training newborn resuscitation<br>Communication neonatal resuscitation program<br>Communication Helping Babies Breathe                                                                                                                                                                                                                                                                                                                              |
| Expert coaching                           | Coaching newborn resuscitation<br>Mentoring newborn resuscitation<br>Telemedicine newborn resuscitation                                                                                                                                                                                                                                                                                                                                                                                        |
| Automated guidance                        | Mobile health newborn resuscitation<br>Smartphone newborn resuscitation                                                                                                                                                                                                                                                                                                                                                                                                                        |
| Delivery room checklists                  | Newborn resuscitation delivery log<br>Helping Babies Breathe checklist<br>Helping Babies Breathe reflection<br>Newborn resuscitation reflection<br>Neonatal resuscitation self-reflection<br>Neonatal Resuscitation Program reflection<br>Newborn delivery log reflection<br>Quality improvement neonatal resuscitation LMIC<br>Quality improvement Helping Babies Breathe<br>Quality improvement Neonatal Resuscitation Program<br>Quality improvement self-reflection neonatal resuscitation |
| Audits                                    | Helping Babies Breathe case reviews<br>Newborn resuscitation case reviews                                                                                                                                                                                                                                                                                                                                                                                                                      |
| Debriefing                                | Debriefing neonatal resuscitation<br>Debriefing newborn resuscitation<br>Debriefing LMIC<br>Helping Babies Breathe debriefing                                                                                                                                                                                                                                                                                                                                                                  |
